# Supplementary material
Source: Springer Nature journal article supplement (https://www.springermedizin.de/resource/supplementary/13256_2009_1878_MOESM3_ESM.pdf/9648650)

0481  
F

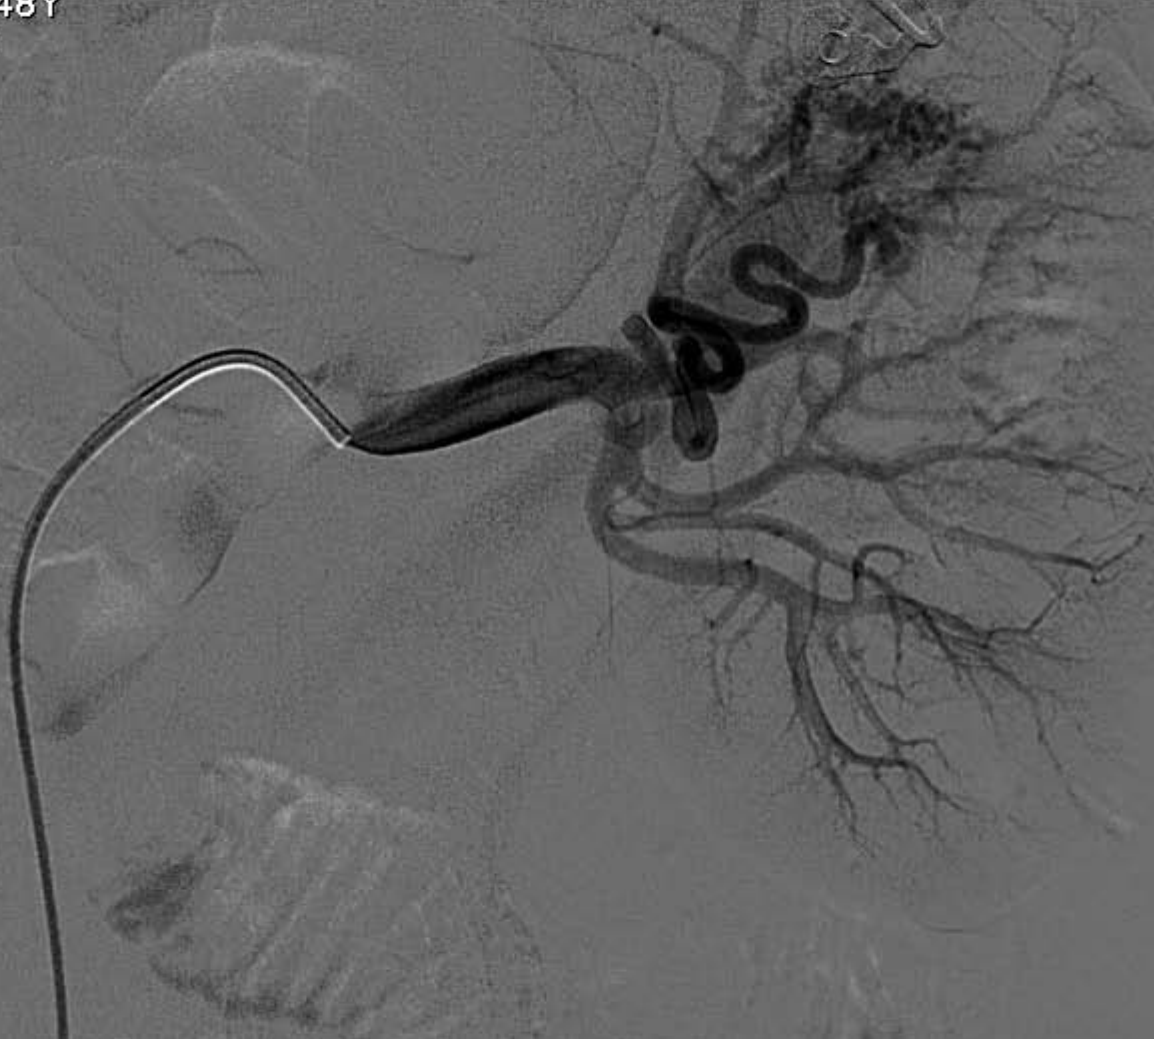

Supplement: MOESM3 [file 9648650]
